# Supplementary material for: Standardizing CYP2D6 Genotype to Phenotype Translation: Consensus Recommendations from the Clinical Pharmacogenetics Implementation Consortium and Dutch Pharmacogenetics Working Group
Source: PubMed Central journal article supplement — Clin Transl Sci. 2019 Oct 24;13(1):116–24. doi: 10.1111/cts.12692 (PMC6951851; doi:10.1111/cts.12692), 2019-10-24
Supplement: CTS-13-116-s001.pdf [file CTS-13-116-s001.pdf]

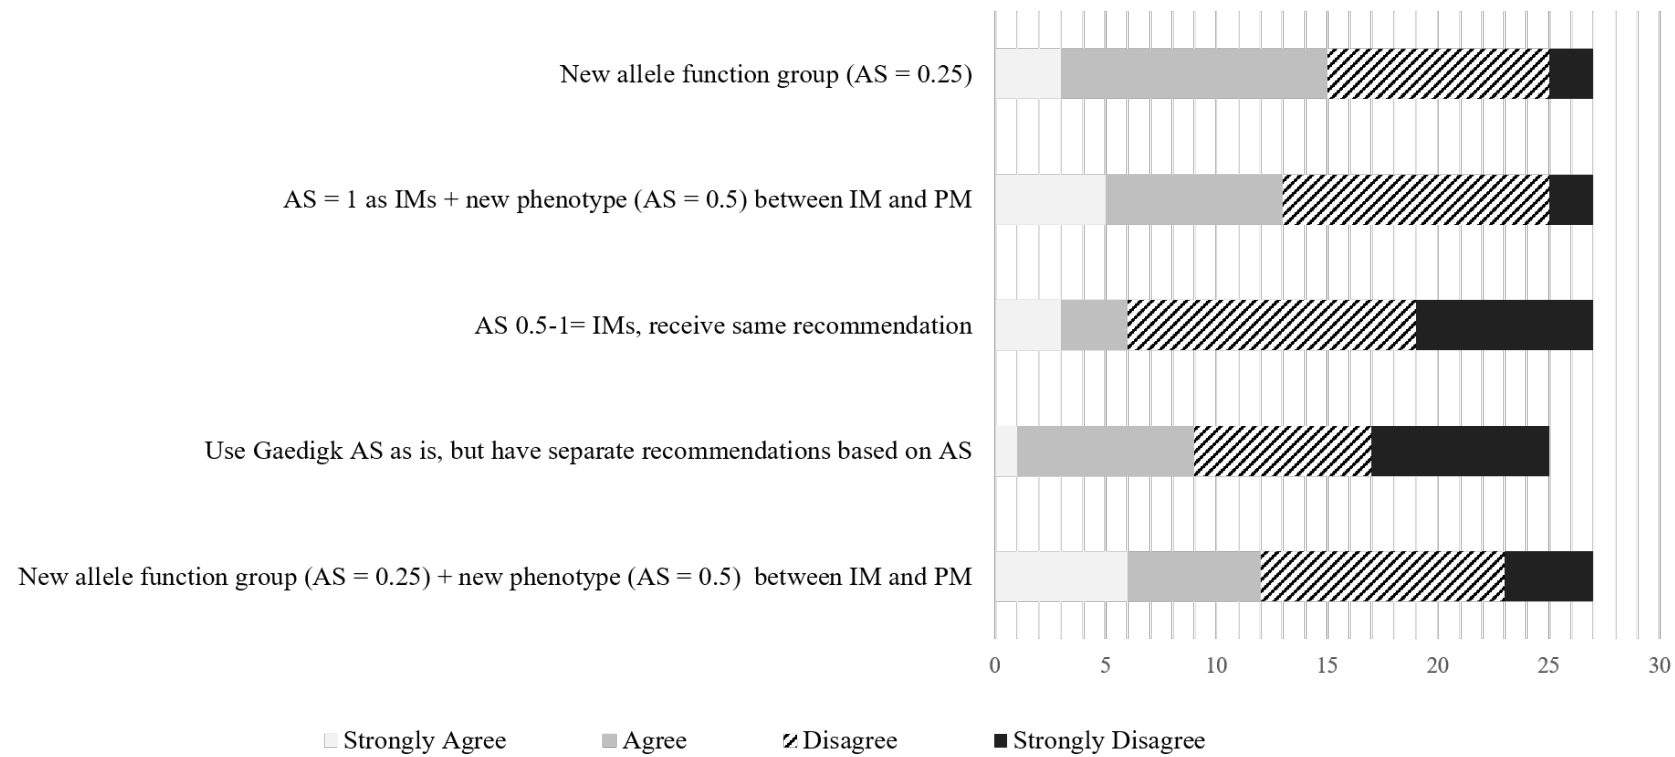

**Figure S1. Results from Survey 1 showing level of agreement on *CYP2D6* genotype to phenotype methods**

**Table S1. Refinement phase survey results**

| <b>Activity score</b> | <b>Expert response</b> |                     |
|-----------------------|------------------------|---------------------|
| <b>0.25</b>           | IM 56% (n=14)          | PM 44% (n=11)       |
| <b>2.25</b>           | UM 52% (n=13)          | NM 48% (n=12)       |
| <b>1.25</b>           | NM 60% (n=15)          | IM 40% (n=10)       |
| <b>ranges</b>         | Option 1 52% (n=14)    | Option 2 41% (n=11) |

**Option 1: UM >2.25; NM 1.25-2.25; IM 0.25-1; PM 0**

**Option 2: UM >2; NM 1.25-2; IM 0.25-1; PM 0**

**Table S2. Comparison of CPIC genotype to phenotype translations across CYP enzymes**

| Phenotype | CYP2B6                                                                                         | CYP2C9                                                                                                                                                                                     | CYP2C19                                                                                                                                                           | CYP2D6                                                                                          |
|-----------|------------------------------------------------------------------------------------------------|--------------------------------------------------------------------------------------------------------------------------------------------------------------------------------------------|-------------------------------------------------------------------------------------------------------------------------------------------------------------------|-------------------------------------------------------------------------------------------------|
| UM        | increased + increased                                                                          | n/a                                                                                                                                                                                        | increased + increased                                                                                                                                             | >2 copies of normal (AS > 2)                                                                    |
| RM        | normal + increased                                                                             | n/a                                                                                                                                                                                        | normal + increased                                                                                                                                                | n/a                                                                                             |
| NM        | normal + normal                                                                                | normal + normal                                                                                                                                                                            | normal + normal                                                                                                                                                   | normal + normal (AS=2)<br>normal + decreased (AS=1.5)                                           |
| IM        | normal + decreased<br>normal + no function<br>increased + decreased<br>increased + no function | normal + decreased<br>normal + no function<br>normal + possible decreased (“possible IM”)                                                                                                  | normal + decreased (“likely IM”)<br>normal + no function<br>increased + decreased (“likely IM”)<br>increased + no function<br>decreased + decreased (“likely IM”) | normal + no function (AS=1)<br>decreased + decreased (AS=1)<br>decreased + no function (AS=0.5) |
| PM        | decreased + decreased<br>no function + no function<br>decreased + no function                  | decreased + decreased<br>no function + no function<br>decreased + no function<br>decreased + possible decreased (“possible PM”)<br>possible decreased + possible decreased (“possible PM”) | no function + no function<br>decreased + no function (“likely PM”)                                                                                                | no function + no function (AS=0)                                                                |

**Increased, increased function allele; normal, normal function allele; decreased, decreased function allele; no function, no function allele**

**UM, ultrarapid metabolizer; RM, rapid metabolizer; NM, normal metabolizer; IM, intermediate metabolizer; PM, poor metabolizer**
